# Supplementary material
Source: publisher figshare collection journal article supplement (https://karger.figshare.com/articles/dataset/_/12981671)
Supplement: Supplementary file 1 [file 1]

**Supplementary Figure**

Examples of MRI scans assessed for quality. Sequences T1 (top row), T2 (middle row) and SWAN (bottom row) were evaluated and categorized as good (left column), moderate (middle column), or poor (right column) quality.
